# Supplementary material for: Theoretical insight into mercury species adsorption on graphene-based Pt single-atom catalysts
Source: Royal Society of Chemistry journal article supplement (doi:10.1039/d1ra08891b), 2022-01-01
Supplement: d1ra08891b1.pdf [file d1ra08891b1.pdf]

## Supplementary data

# Theoretical insight into mercury species adsorption on graphene-based Pt Single-atom catalysts

Wenchao Ji<sup>a</sup>, Xiuhua Xiao<sup>a</sup>, Feiyue Li<sup>a</sup>, Xingjun Fan<sup>a</sup>, Yuanyuan Meng<sup>b†</sup> and Maohong Fan<sup>c†</sup>

a. College of Resource and Environment, Anhui Science and Technology University, Fengyang  
233100, China.

b. College of Chemistry & Chemical Engineering, Taiyuan University of Technology, Taiyuan 030024,  
P. R. China.

c. Departments of Chemical and Petroleum Engineering, University of Wyoming, Laramie, WY  
82071, USA.

† Correspondence: mengyuanyuan@tyut.edu.cn (Y.M.); mfan@uwyo.edu (M.F.); Tel.: +86 351  
6014 498 (Y.M); (307) 766-5633 (M.F)

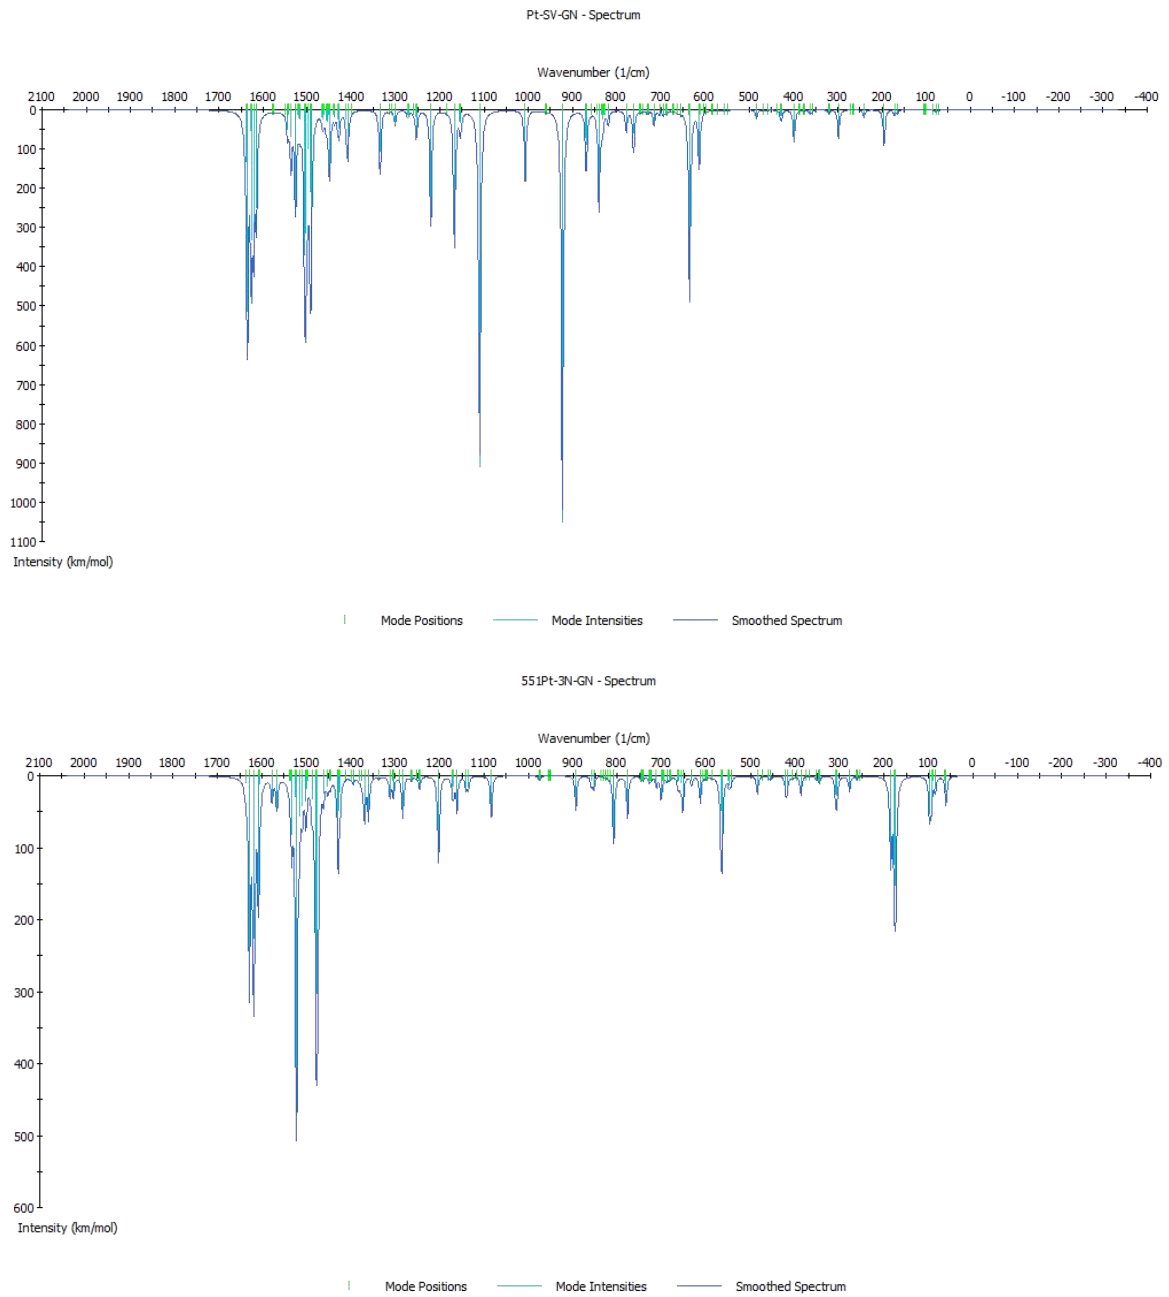

**Figure S1:** The IR spectrums of Pt/SV-GN and Pt/3N-GN catalysts

**Table S1** The Gibbs free energy change for mercury species in Pt/SV-GN and Pt/3N-GN at a temperature range of 250-1000K

| T (K)  | 1000/T (K <sup>-1</sup> ) | Gibbs free energy change on Pt/SV-GN<br>ΔG (kJ/mol) |                |                   |                            |                           | Gibbs free energy change on Pt/3N-GN<br>ΔG (kJ/mol) |                |                   |                            |                           |
|--------|---------------------------|-----------------------------------------------------|----------------|-------------------|----------------------------|---------------------------|-----------------------------------------------------|----------------|-------------------|----------------------------|---------------------------|
|        |                           | Hg <sup>0</sup>                                     | HgCl molecular | HgCl dissociation | HgCl <sub>2</sub> vertical | HgCl <sub>2</sub> bending | Hg <sup>0</sup>                                     | HgCl molecular | HgCl dissociation | HgCl <sub>2</sub> vertical | HgCl <sub>2</sub> bending |
| 250    | 4.0                       | -63.910                                             | -220.731       | -296.043          | -102.263                   | -106.496                  | -99.074                                             | -274.238       | -357.359          | -160.419                   | -314.076                  |
| 275    | 3.6                       | -65.740                                             | -222.533       | -297.264          | -104.495                   | -108.473                  | -99.893                                             | -275.070       | -357.832          | -163.061                   | -315.941                  |
| 298.15 | 3.4                       | -67.488                                             | -224.246       | -298.434          | -106.606                   | -110.337                  | -100.675                                            | -275.868       | -358.292          | -165.556                   | -317.709                  |
| 300    | 3.3                       | -67.634                                             | -224.388       | -298.535          | -106.781                   | -110.492                  | -100.737                                            | -275.935       | -358.333          | -165.761                   | -317.855                  |
| 325    | 3.1                       | -69.569                                             | -226.286       | -299.843          | -109.114                   | -112.531                  | -101.611                                            | -276.842       | -358.873          | -168.520                   | -319.824                  |
| 350    | 2.9                       | -71.563                                             | -228.234       | -301.201          | -111.501                   | -114.609                  | -102.497                                            | -277.778       | -359.445          | -171.321                   | -321.834                  |
| 375    | 2.7                       | -73.590                                             | -230.215       | -302.593          | -113.925                   | -116.711                  | -103.408                                            | -278.752       | -360.051          | -174.180                   | -323.904                  |
| 400    | 2.5                       | -75.664                                             | -232.238       | -304.031          | -116.391                   | -118.847                  | -104.336                                            | -279.751       | -360.683          | -177.081                   | -326.010                  |
| 425    | 2.4                       | -77.775                                             | -234.299       | -305.503          | -118.899                   | -121.004                  | -105.281                                            | -280.784       | -361.343          | -180.019                   | -328.155                  |
| 450    | 2.2                       | -79.919                                             | -236.389       | -306.999          | -121.432                   | -123.182                  | -106.242                                            | -281.837       | -362.029          | -183.004                   | -330.341                  |
| 475    | 2.1                       | -82.097                                             | -238.513       | -308.533          | -123.999                   | -125.377                  | -107.220                                            | -282.920       | -362.743          | -186.017                   | -332.560                  |
| 500    | 2.0                       | -84.308                                             | -240.670       | -310.101          | -126.603                   | -127.596                  | -108.211                                            | -284.028       | -363.483          | -189.069                   | -334.818                  |
| 525    | 1.9                       | -86.553                                             | -242.860       | -311.697          | -129.232                   | -129.841                  | -109.219                                            | -285.160       | -364.248          | -192.158                   | -337.108                  |
| 550    | 1.8                       | -88.822                                             | -245.079       | -313.323          | -131.895                   | -132.102                  | -110.238                                            | -286.314       | -365.038          | -195.280                   | -339.432                  |
| 575    | 1.7                       | -91.121                                             | -247.320       | -314.974          | -134.583                   | -134.380                  | -111.271                                            | -287.493       | -365.845          | -198.432                   | -341.786                  |
| 600    | 1.7                       | -93.441                                             | -249.581       | -316.642          | -137.291                   | -136.671                  | -112.320                                            | -288.692       | -366.677          | -201.617                   | -344.172                  |
| 625    | 1.6                       | -95.790                                             | -251.876       | -318.348          | -140.029                   | -138.983                  | -113.373                                            | -289.909       | -367.529          | -204.827                   | -346.580                  |
| 650    | 1.5                       | -98.165                                             | -254.188       | -320.070          | -142.792                   | -141.311                  | -114.444                                            | -291.146       | -368.399          | -208.071                   | -349.030                  |
| 675    | 1.5                       | -100.560                                            | -256.528       | -321.817          | -145.576                   | -143.652                  | -115.526                                            | -292.404       | -369.293          | -211.336                   | -351.496                  |
| 700    | 1.4                       | -102.980                                            | -258.886       | -323.589          | -148.381                   | -146.009                  | -116.621                                            | -293.679       | -370.205          | -214.630                   | -353.991                  |

| T (K) | 1000/T (K <sup>-1</sup> ) | Gibbs free energy change on Pt/SV-GN<br>ΔG (kJ/mol) |                   |                      |                               |                              | Gibbs free energy change on Pt/3N-GN<br>ΔG (kJ/mol) |                   |                      |                               |                              |
|-------|---------------------------|-----------------------------------------------------|-------------------|----------------------|-------------------------------|------------------------------|-----------------------------------------------------|-------------------|----------------------|-------------------------------|------------------------------|
|       |                           | Hg <sup>0</sup>                                     | HgCl<br>molecular | HgCl<br>dissociation | HgCl <sub>2</sub><br>vertical | HgCl <sub>2</sub><br>bending | Hg <sup>0</sup>                                     | HgCl<br>molecular | HgCl<br>dissociation | HgCl <sub>2</sub><br>vertical | HgCl <sub>2</sub><br>bending |
| 725   | 1.4                       | -105.417                                            | -261.269          | -325.379             | -151.202                      | -148.375                     | -117.721                                            | -294.971          | -371.128             | -217.944                      | -356.508                     |
| 750   | 1.3                       | -107.875                                            | -263.668          | -327.188             | -154.049                      | -150.762                     | -118.837                                            | -296.287          | -372.081             | -221.288                      | -359.053                     |
| 775   | 1.3                       | -110.358                                            | -266.092          | -329.023             | -156.921                      | -153.161                     | -119.957                                            | -297.617          | -373.043             | -224.657                      | -361.620                     |
| 800   | 1.3                       | -112.857                                            | -268.533          | -330.871             | -159.805                      | -155.569                     | -121.094                                            | -298.963          | -374.025             | -228.052                      | -364.215                     |
| 825   | 1.2                       | -115.374                                            | -270.995          | -332.744             | -162.710                      | -157.993                     | -122.239                                            | -300.330          | -375.028             | -231.462                      | -366.832                     |
| 850   | 1.2                       | -117.911                                            | -273.470          | -334.633             | -165.632                      | -160.426                     | -123.393                                            | -301.705          | -376.044             | -234.898                      | -369.466                     |
| 875   | 1.1                       | -120.469                                            | -275.970          | -336.539             | -168.570                      | -162.871                     | -124.559                                            | -303.101          | -377.077             | -238.355                      | -372.124                     |
| 900   | 1.1                       | -123.040                                            | -278.482          | -338.462             | -171.525                      | -165.329                     | -125.734                                            | -304.510          | -378.122             | -241.837                      | -374.808                     |
| 925   | 1.1                       | -125.627                                            | -281.011          | -340.401             | -174.502                      | -167.804                     | -126.912                                            | -305.931          | -379.179             | -245.336                      | -377.508                     |
| 950   | 1.1                       | -128.236                                            | -283.561          | -342.362             | -177.494                      | -170.282                     | -128.108                                            | -307.373          | -380.262             | -248.855                      | -380.229                     |
| 975   | 1.0                       | -130.852                                            | -286.119          | -344.331             | -180.496                      | -172.769                     | -129.308                                            | -308.827          | -381.353             | -252.396                      | -382.967                     |
| 1000  | 1.0                       | -133.490                                            | -288.698          | -346.320             | -183.518                      | -175.269                     | -130.520                                            | -310.299          | -382.460             | -255.957                      | -385.730                     |
